# Supplementary material for: Human-induced nitrogen–phosphorus imbalances alter natural and managed ecosystems across the globe
Source: Springer Nature journal article supplement (doi:10.1038/ncomms3934), 2013-12-17
Supplement: 41467_2013_BFncomms3934_MOESM941_ESM.pdf [file 41467_2013_BFncomms3934_MOESM941_ESM.pdf]

## Supplementary Information

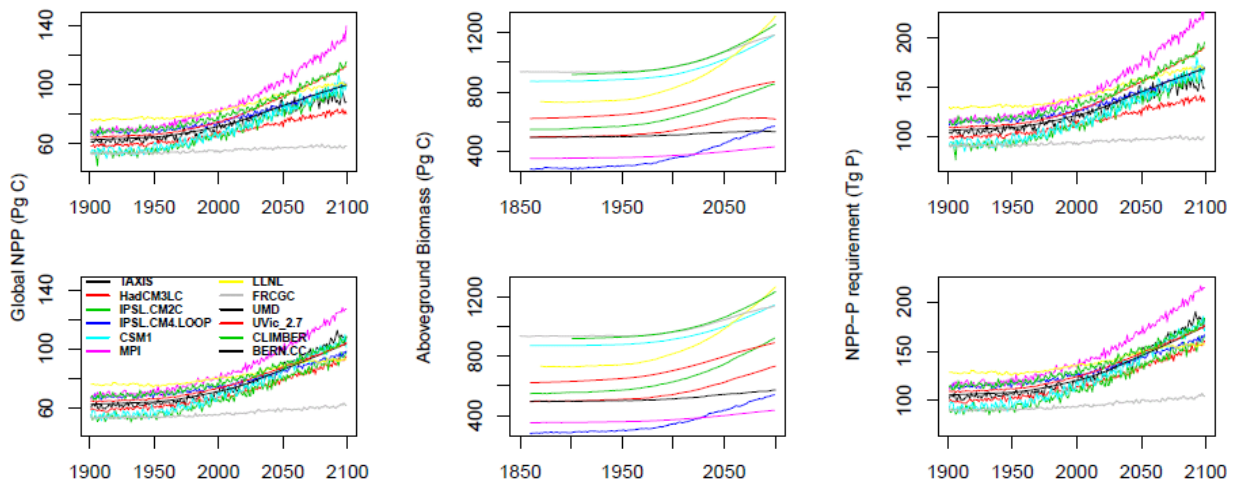

**Supplementary Figure S1: Projected terrestrial carbon fluxes and stocks, and P requirements**

Simulated coupled (top panels) and uncoupled (lower panels) response of terrestrial carbon fluxes and stocks from the C4MIP climate carbon cycle model ensemble. The NPP-P requirement is estimated based on the stoichiometric ratios of Kattge *et al.*<sup>71</sup>, assuming that woody NPP is one-third of total NPP and active tissues (leaves/roots) are two-thirds.

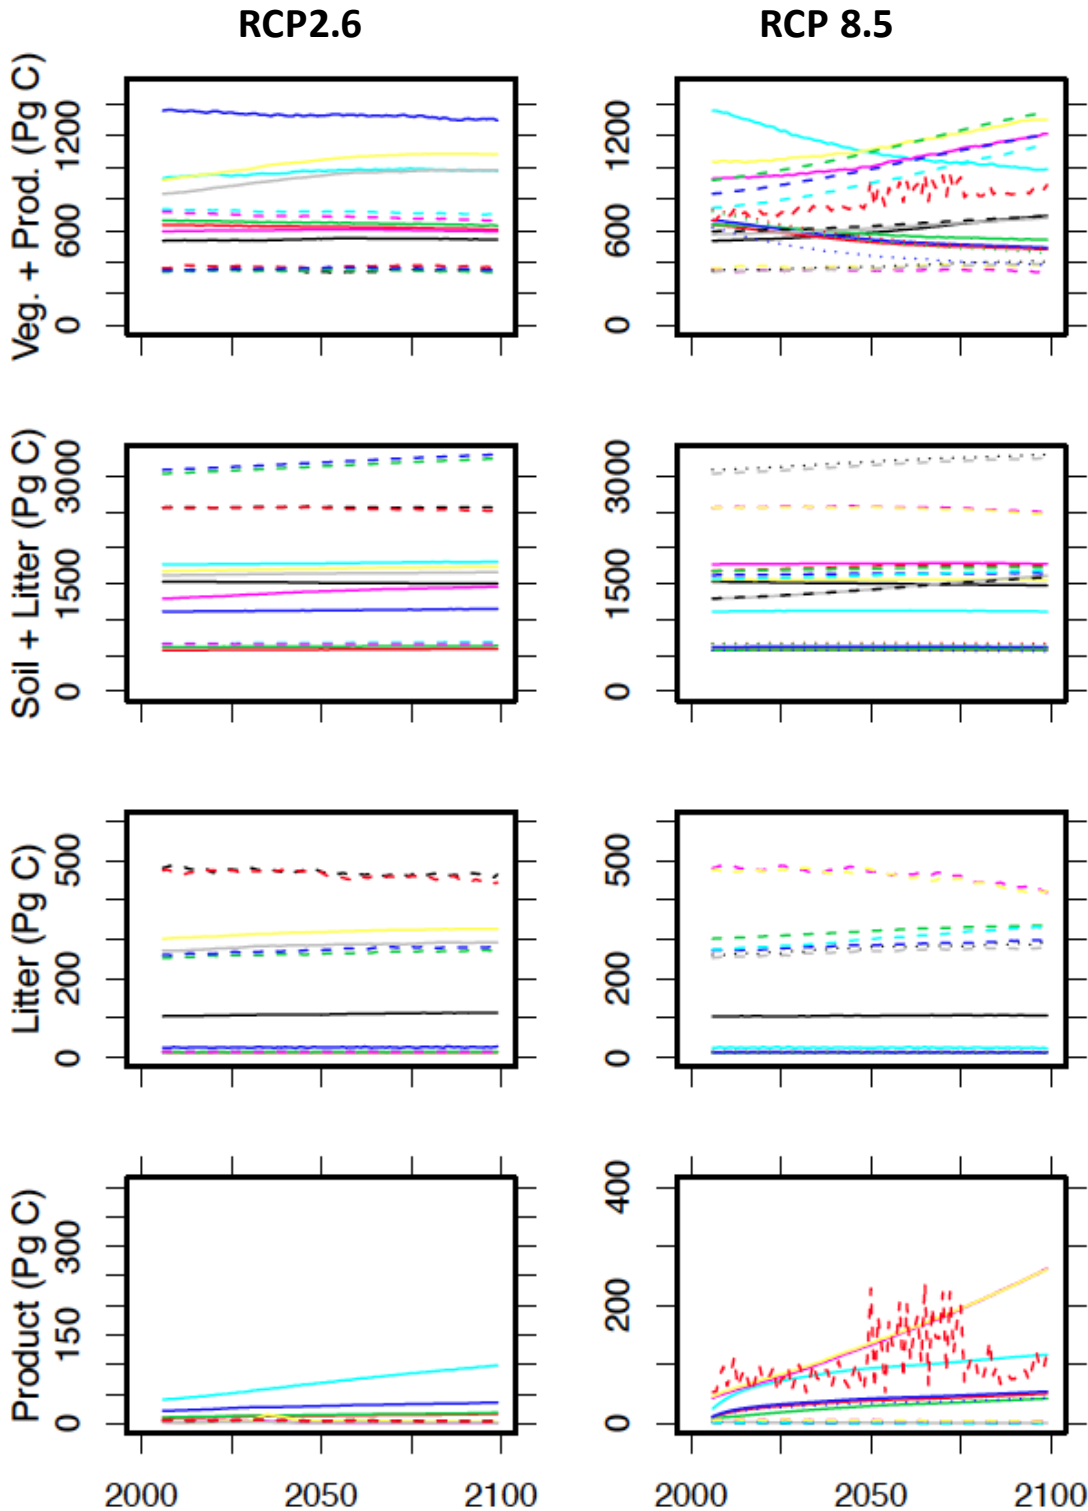

**Supplementary Figure S2: Time series plot of the 21<sup>st</sup> century evolution of carbon pools treated in this analysis from Supplementary Table S3.**

Please note the wide range of variability across all pools, for example, more than 1000 PgC uncertainty in vegetation and in soil carbon stocks. In addition, directional changes in vegetation carbon stocks vary significantly in RCP 8.5 in addition to interannual variability where year-to-year changes in land cover change can influence vegetation and product pools of carbon.

**Supplementary Table S1.** Detailing results shown in Fig. 4. Effects of atmospheric nitrogen deposition on lake-water N:P ratio ↑ = increases, ↓ = decreases

| Species and/or community studies and pollutant sources | Study site                      | Main results | Reference |
|--------------------------------------------------------|---------------------------------|--------------|-----------|
| Lakes                                                  | Field                           | ↑ N:P water  | 72        |
| Lakes                                                  | Meta-analyses of published data | ↑ N:P water  | 12        |
| Lakes                                                  | Field                           | ↑ N:P water  | 73        |
| Lakes                                                  | Meta-analyses of field data     | ↑ N:P water  | 74        |
| Lakes                                                  | Field                           | ↑ N:P water  | 75        |
| Lakes                                                  | Field                           | ↑ N:P water  | 76        |

**Supplementary Table S2.** Detailing results shown in Fig. 4. Effects of water eutrophication on river and estuaries water N:P ratio.  $\uparrow$  = increases,  $\downarrow$  = decreases

| Species and/or community studies and pollutant sources | Study site | Main results                                                           | Reference |
|--------------------------------------------------------|------------|------------------------------------------------------------------------|-----------|
| Lakes                                                  | Field      | $\uparrow$ N:P in cropland areas<br>$\downarrow$ N:P in pasture areas  | 18        |
| Urban and crop waste loadings in estuary (Turkey)      | Field      | $\downarrow$ N:P                                                       | 77        |
| Urban and crop waste loadings in estuary (USA)         | Field      | $\uparrow$ N:P                                                         | 78        |
| Urban and crop waste loadings in estuary (China)       | Field      | $\uparrow$ N:P                                                         | 79        |
| Loadings from 2 estuaries in Chesapeake Bay            | Field      | $\uparrow$ N:P in Choptank River<br>$\downarrow$ N:P in Patuxent River | 80        |
| Great river loadings                                   | Review     | $\uparrow$ N:P                                                         | 81        |
| San Francisco estuary (California)                     | Field      | $\uparrow$ N:P                                                         | 82        |
| Krka river estuary (Adriatic sea)                      | Field      | $\uparrow$ N:P                                                         | 83        |
| Urban and crop waste loadings in estuary (China)       | Field      | $\uparrow$ N:P                                                         | 84        |
| Outh Norway watersheds                                 | Field      | $\uparrow$ N:P                                                         | 85        |
| Pearl river estuary (China)                            | Field      | $\uparrow$ N:P                                                         | 86        |
| Loadings from Rhine to sea (periode 1950-1985)         | Field      | $\uparrow$ N:P                                                         | 87        |
| Grand Bay (Alabama)                                    | Field      | $\downarrow$ N:P                                                       | 88        |
| Northern Gulf of Mexico                                | Field      | $\uparrow$ N:P                                                         | 89        |
| Mississippi river (USA)                                | Field      | $\uparrow$ N:P                                                         | 89        |
| Areas of Adriatic                                      | Field      | $\downarrow$ N:P                                                       | 89        |
| Po river (Italy)                                       | Field      | $\downarrow$ N:P                                                       | 89        |
| Izmir Bay (Turkey)                                     | Field      | $\downarrow$ N:P                                                       | 90        |
| German Bight                                           | Field      | $\uparrow$ N:P                                                         | 91        |
| Gulf of Nicoya (Costa Rica)                            | Field      | $\uparrow$ N:P                                                         | 92        |
| Urban and crop waste                                   | Field      | $\uparrow$ N:P                                                         | 93        |

|                                                                               |        |       |             |
|-------------------------------------------------------------------------------|--------|-------|-------------|
| loadings in estuary (China)                                                   |        |       |             |
| Gulf of Trieste (Adriatic sea)                                                | Field  | ↑ N:P | 94          |
| Urban and crop waste loadings in estuary (Argentina)                          | Field  | ↑ N:P | 95          |
| Urban and crop waste loadings in some estuaries (England)                     | Field  | ↑ N:P | 96          |
| Diverse mangrove areas (India)                                                | Field  | ↑ N:P | 97          |
| Northern of Gulf of Mexico                                                    | Field  | ↑ N:P | 98          |
| Urban and crop waste loadings in North sea from Belgium to Gemany (1977-2000) | Field  | ↑ N:P | 99          |
| Sewage treatment waste loadings in coastal waters (Brazil)                    | Field  | ↑ N:P | 100         |
| Loadings from Changjiang river (China)                                        | Field  | ↑ N:P | 101         |
| Great river loadings                                                          | Review | ↑ N:P | 14          |
| Mississippi River loadings in Gulf of Mexico                                  | Field  | ↑ N:P | 102         |
| Acton (Ohio)                                                                  | Field  | ↑ N:P | 103         |
| Pleasant Hill (Ohio)                                                          | Field  | ↑ N:P | 103         |
| Burr oak                                                                      | Field  | ↓ N:P | 103         |
| Urban and crop waste loadings in a water reservoir (Brazil)                   | Field  | ↑ N:P | 104         |
| Sewage treatment waste loadings in water reservoirs (Brazil)                  | Field  | ↑ N:P | 105         |
| Baiyangdian Lake (China)                                                      | Field  | ↑ N:P | 106         |
| Urban waste loadings in coastal ocean waters (China)                          | Field  | ↑ N:P | 107         |
| Hong Kong Harbour area                                                        | Field  | ↑ N:P | 108 and 109 |
| Urban and crop waste loadings in estuary (China)                              | Field  | ↑ N:P | 110         |
| Loadings from Pearl River (China)                                             | Field  | ↑ N:P | 111         |

**Supplementary Table S3.** Detailing results shown in Fig. 4. Effects of increases in water N:P ratio on organisms N:P ratio. ↑= increases, ↓= decreases.

| Species and/or community studies and pollutant sources | Study site          | Main results | Reference |
|--------------------------------------------------------|---------------------|--------------|-----------|
| Calamazo ponds (Michigan)                              | Field               | ↑ N:P        | 112       |
| Trinidad and Tobago streams                            | Field               | ↑ N:P        | 113       |
| Lakes                                                  | Field               | ↑ N:P        | 81        |
| Freshwater                                             | Mesocosm experiment | ↑ N:P        | 114       |
|                                                        | Microcosm           | ↑ N:P        | 115       |
| Lakes                                                  | Field               | ↑ N:P        | 116       |
| Douglas River (North Australia)                        | Field               | ↑ N:P        | 117       |
| Lake Erken (Sweden)                                    | Field               | ↑ N:P        | 118       |

**Supplementary Table S4.** Detailing results shown in Fig. 4. Effects of increases in water N:P ratio on organisms growth rate (GR), defined as the biomass accumulation in function of time. ↑ = increases, ↓ = decreases.

| Species and/or community studies and pollutant sources | Study site                                | Main results          | Reference |
|--------------------------------------------------------|-------------------------------------------|-----------------------|-----------|
|                                                        | Laboratory and stream mesocosm experiment | ↓ GR                  | 119       |
|                                                        | microcosm                                 | No conclusive effects | 120       |
|                                                        | microcosm                                 | ↓ GR                  | 121       |

**Supplementary Table S5.** Detailing results shown in Fig. 4. Relationships of increases in water N:P ratio with ecosystem structure.

| Species and/or community studies and pollutant sources | Study site | Main results                 | Reference |
|--------------------------------------------------------|------------|------------------------------|-----------|
| La Caldera lake (Spain)                                | Field      | Community composition        | 122       |
| Scotland streams                                       | Field      | Community composition        | 123       |
| Lakes                                                  | Field      | Community composition        | 124       |
| Lakes                                                  | Field      | Community composition        | 125       |
| Lakes                                                  | Field      | Community composition        | 126       |
| Lakes                                                  | Field      | Community composition        | 127       |
| World coastal areas, oceans and rivers                 | Review     | Changes in species abundance | 128       |
| Lake Rusalka (Poland)                                  | Field      | Community composition        | 129       |
| Lakes                                                  | Field      | Community composition        | 130       |
|                                                        | Microcosm  | Community composition        | 131       |
|                                                        | Microcosm  | Community composition        | 132       |
| Changliang River (China)                               | Field      | Community composition        | 93        |
|                                                        | Microcosm  | Community composition        | 133       |
| Lakes                                                  | Field      | Community composition        | 134       |
| Lakes                                                  | Field      | Changes in species abundance | 135       |
| Dutch coastal areas                                    | Field      | Community composition        | 136       |
| Izmir Bay                                              | Field      | Community composition        | 137       |
| Lakes                                                  | Field      | Community composition        | 103       |
| Water reservoir (Brazil)                               | Field      | Community composition        | 105       |
| Freshwater                                             | Mesocosm   | Community composition        | 138       |



**Supplementary Table S6.** Detailing results shown in Fig. 4. Relationships of increases in water N:P ratio with ecosystem functional traits.

| Species and/or community studies and pollutant sources | Study site | Main results                                  | Reference |
|--------------------------------------------------------|------------|-----------------------------------------------|-----------|
| Spain stream                                           | Field      | Changes in nutrient cycling                   | 139       |
| La Caldera lake (Spain)                                | Field      | Changes in nutrient cycling                   | 122       |
| Louro Lagoon (Spain)                                   | Field      | Changes in ecosystem N <sub>2</sub> -fixation | 140       |
| Lakes                                                  | Field      | Changes in nutrient cycling                   | 126       |
| Lake                                                   | Field      | Changes in ecosystem N <sub>2</sub> -fixation | 141       |
| Lakes (Washington)                                     | Field      | Changes in ecosystem N <sub>2</sub> -fixation | 142       |
|                                                        | Microcosm  | Changes in nutrient cycling                   | 133       |
| Eel River (California)                                 | Field      | Changes in nutrient cycling                   | 143       |
| Spain stream                                           | Field      | Changes in nutrient cycling                   | 139       |

**Supplementary Table S7.** Detailing results shown in Fig. 4. Relationships of increases in organisms N:P ratio with ecosystem structural traits.

| Species and/or community studies and pollutant sources | Study site | Main results                                                          | Reference |
|--------------------------------------------------------|------------|-----------------------------------------------------------------------|-----------|
| Lake                                                   | Field      | Changes in species abundance and life stage                           | 144       |
| Alpine streams                                         | Field      | Changes in community composition                                      | 145       |
| Lakes                                                  | Field      | Changes in community composition                                      | 130       |
| Caribbean region                                       | Field      | Changes in community composition                                      | 146       |
| Lake                                                   | Field      | Changes in species abundance and sexual form abundance within species | 147       |
| Antarctic ocean                                        | Field      | Changes in community composition                                      | 148       |

**Supplementary Table S8.** Detailing results shown in Fig. 4. Relationships of increases in organisms N:P ratio with ecosystem functional traits.

| Species and/or community studies and pollutant sources | Study site                    | Main results                           | Reference   |
|--------------------------------------------------------|-------------------------------|----------------------------------------|-------------|
| Lake Eire                                              | Field                         | Nutrient cycling                       | 149         |
| Mediterranean forest streams                           | Field                         | Nutrient cycling                       | 130         |
|                                                        | Microcosms                    | Changes in nutrient uptake and cycling | 150         |
| Lakes                                                  | Field                         | Changes in nutrient cycling            | 151         |
| Lake                                                   | Field                         | Changes in nutrient cycling            | 152         |
| Lakes                                                  | Field                         | Changes in nutrient cycling            | 125         |
| Lakes                                                  | Field                         | Changes in nutrient cycling            | 126         |
| Freshwater ecosystems                                  | Metadata study                | Changes in nutrient cycling            | 153         |
|                                                        | Microcosm and mesocosm        | Changes in nutrient cycling            | 154         |
| Water reservoirs (Ohio)                                | Field                         | Changes in nutrient cycling            | 155         |
|                                                        | Microcosm                     | Changes in nutrient cycling            | 156         |
| Andean rivers                                          | Field                         | Changes in nutrient cycling            | 157         |
| Huanghai Sea                                           | Field                         | Changes in nutrient cycling            | 158         |
| Lakes                                                  | Field                         | Changes in nutrient cycling            | 76          |
| Diverse streams (USA)                                  | Field                         | Changes in nutrient cycling            | 159         |
| Lake                                                   | Field                         | Changes in nutrient cycling            | 160 and 161 |
| Lake                                                   | Field manipulation experiment | Changes in nutrient cycling            | 162         |
| Lakes                                                  | Metadata study                | Changes in nutrient cycling            | 163         |
| Lakes                                                  | Metadata study                | Changes in nutrient cycling            | 164         |
| Lake                                                   | Field                         | Changes in nutrient cycling            | 165         |
| Lake                                                   | Field                         | Changes in nutrient cycling            | 166         |
| Rio "Las Marias" (Venezuela)                           | Field                         | Changes in nutrient cycling            | 167         |
| Lake                                                   | Field                         | Changes in reproduction function       | 147         |

**Supplementary Table S9.** Detailing results shown in Fig. 4. Relationships of increases in organisms N:P ratio with organism growth rate (GR) defined as the biomass accumulation in function of time. ↑ = increases ↓ = decreases.

| Species and/or community studies and pollutant sources | Study site            | Main results                                        | Reference |
|--------------------------------------------------------|-----------------------|-----------------------------------------------------|-----------|
| Antarctic ocean                                        | Field                 | ↓ GR in intraspecific comparisons                   | 168       |
| Antarctic ocean                                        | Field                 | No related in bacteria in interspecific comparisons | 168       |
| La Caldera lake (Spain)                                | Field                 | ↓ GR                                                | 169       |
|                                                        | Microcosm             | No related                                          | 170       |
|                                                        | Microcosm             | ↓ GR (when nutrients are no limiting)               | 171       |
|                                                        | Microcosm             | No conclusive relationships                         | 172       |
|                                                        | Microcosm             | ↓ GR                                                | 173       |
|                                                        | Review metadata       | ↓ GR                                                | 174       |
| Baltic Sea                                             | Field                 | ↑ GR                                                | 175       |
|                                                        | Microcosm experiment  | ↓ GR                                                | 133       |
|                                                        | Review metadata       | ↓ GR                                                | 20        |
|                                                        | Microcosm             | ↓ GR                                                | 176       |
| Lake                                                   | Field                 | ↓ GR (when nutrients are no limiting)               | 177       |
|                                                        | Microcosm             | ↓ GR                                                | 115       |
| Lakes                                                  | Field                 | ↓ GR                                                | 178       |
|                                                        | Mesocosm              | ↓ GR                                                | 179       |
| Lake                                                   | Field                 | ↓ GR (when nutrients are no limiting)               | 180       |
| La Caldera lake (Spain)                                | Field                 | ↓ GR in phytoplanktos                               | 181       |
| La Caldera lake (Spain)                                | Field                 | No related in bacteria                              | 181       |
|                                                        | Review metadata study | ↓ GR (when nutrients are no limiting)               | 182       |
|                                                        | Microcosm             | No related                                          | 183       |

**Supplementary Table S10.** Detailing results shown in Fig. 4. Relationships of organism's growth rate (GR), defined as the biomass accumulation in function of time, with ecosystem structural traits.

| Species and/or community studies and pollutant sources | Study site | Main results                      | Reference |
|--------------------------------------------------------|------------|-----------------------------------|-----------|
| Lake                                                   | Field      | Community composition             | 184       |
|                                                        | Mesocosm   | Community composition             | 185       |
|                                                        | Review     | Changes in web community function | 186       |

**Supplementary Table S11.** Detailing results shown in Fig. 4. Effects of atmospheric N deposition on soil/litter N:P ratio. ↑= increases, ↓= decreases.

| Species and/or community studies and pollutant sources | Study site | Main results          | Reference |
|--------------------------------------------------------|------------|-----------------------|-----------|
| Northwest Germany                                      | Field      | ↑ N:P                 | 187       |
| Netherlands                                            | Field      | ↑ N:P                 | 188       |
| Denbighshire (Wales)                                   | Field      | ↑ N:P                 | 189       |
| Great Britain grasslands                               | Field      | No conclusive results | 190       |

**Supplementary Table S12.** Detailing results shown in Fig. 4. Effects of increases in soil/litter N:P ratio on organisms N:P ratio. ↑= increases, ↓= decreases.

| Species and/or community studies and pollutant sources | Study site        | Main results | Reference |
|--------------------------------------------------------|-------------------|--------------|-----------|
|                                                        | Metadata analysis | ↑ N:P        | 191       |
|                                                        | Greenhouse        | ↑ N:P        | 192       |
|                                                        | Review            | ↑ N:P        | 193       |
|                                                        | Common garden     | ↑ N:P        | 194       |
| Soil toposequence                                      | Field             | ↑ N:P        | 195       |
| Meadows                                                | Field             | ↑ N:P        | 196       |
|                                                        | Common garden     | ↑ N:P        | 197       |
|                                                        | Common garden     | ↑ N:P        | 198       |
|                                                        | Metadata analysis | ↑ N:P        | 191       |

**Supplementary Table S13.** Detailing results shown in Fig. 4. Effects of increases in soil N:P ratio on organisms growth rate (GR) defined as the biomass accumulation in function of time. ↑ = increases, ↓ = decreases.

| Species and/or community studies and pollutant sources | Study site               | Main results | Reference |
|--------------------------------------------------------|--------------------------|--------------|-----------|
|                                                        | Review                   | ↓ GR         | 193       |
| Grassland community                                    | Common garden experiment | ↓ GR         | 199       |
|                                                        | Common garden            | ↓ GR         | 197       |
|                                                        | Common garden            | ↓ GR         | 198       |



**Supplementary Table S14.** Detailing results shown in Fig. 4. Relationships of increases in soil/litter N:P ratio with ecosystem structural traits.

| Species and/or community studies and pollutant sources | Study site           | Main results                 | Reference |
|--------------------------------------------------------|----------------------|------------------------------|-----------|
| Mount St. Helens (Washington)                          | Field and greenhouse | Changes in species abundance | 200       |
| Mount St. Helens (Washington)                          | Field                | Community composition        | 201       |
| Forest (Czech Republic)                                | Field                | Decrease in species richness | 202       |
| Grassland (The Netherlands)                            | Field                | Community composition        | 203       |
| Grassland (The Netherlands)                            | Field                | Decrease in species richness | 204       |
| Shrublands (Mongolia)                                  | Field                | Changes in species richness  | 25        |
| Austria forest                                         | Field                | Community composition        | 205       |
|                                                        | Metadata analyses    | Community composition        | 196       |
| New Zealand forest                                     | Field                | Community composition        | 206       |

**Supplementary Table S15.** Detailing results shown in Fig. 4. Relationships of increases in soil/litter N:P ratio with ecosystem functional traits.

| Species and/or community studies and pollutant sources | Study site        | Main results                       | Reference |
|--------------------------------------------------------|-------------------|------------------------------------|-----------|
|                                                        | Metadata analysis | Changes in nutrient cycling        | 191       |
| Mount St. Helens (Washington)                          | Field             | Changes in N <sub>2</sub> fixation | 201       |
| Forest (Spain)                                         | Field             | Changes in nutrient cycling        | 207       |
|                                                        | Microcosm         | Changes in nutrient cycling        | 208       |
| Meadows (Switzerland)                                  | Field             | Changes in nutrient cycling        | 209       |
| Amazonian forest (French Guiana)                       | Field             | Changes in nutrient cycling        | 210       |
| Austria forest                                         | Field             | Changes in nutrient cycling        | 206       |
| Forest (Australia)                                     | Field             | Changes in nutrient cycling        | 211       |
| Steppe (Mongolia)                                      | Field             | Changes in plant nutrient uptake   | 212       |

**Supplementary Table S16.** Detailing results shown in Fig. 4. Effects of increases in organism's N:P ratio on organisms growth rate (GR). ↑= increases. ↓= decreases.

| Species and/or community studies and pollutant sources | Study site              | Main results                          | Reference |
|--------------------------------------------------------|-------------------------|---------------------------------------|-----------|
|                                                        | Metadata analysis       | ↓ GR (when nutrients are no limiting) | 213       |
| Tropical forest (Panama)                               | Field                   | ↓ GR (when nutrients are no limiting) | 214       |
|                                                        | Common garden           | ↑ GR                                  | 215       |
|                                                        | Metadata analysis       | ↓ GR (when nutrients are no limiting) | 216       |
| Fens (USA)                                             | Field                   | ↓ GR                                  | 217       |
|                                                        | Review                  | ↓ GR                                  | 26        |
|                                                        | Common garden           | ↓ GR (when nutrients are no limiting) | 218       |
|                                                        | Microcosm               | ↓ GR                                  | 174       |
| Forest (California)                                    | Field and greenhouse    | No relationships                      | 219       |
|                                                        | Review                  | ↓ GR                                  | 220       |
|                                                        | Common garden           | ↓ GR                                  | 221       |
|                                                        | Review                  | ↓ GR                                  | 222       |
|                                                        | Metadata analysis       | ↓ GR                                  | 182       |
| Panama                                                 | Field and common garden | ↓ GR                                  | 197       |
|                                                        | Microcosm               | ↓ GR                                  | 223       |
| European wetlands                                      | Field                   | ↓ GR                                  | 224       |
|                                                        | Common garden           | ↓ GR (when nutrients are no limiting) | 225       |

**Supplementary Table S17.** Detailing results shown in Fig. 4. Relationships of increases in organisms N:P ratio with ecosystem structural traits.

| <b>Species and/or community studies and pollutant sources</b> | <b>Study site</b> | <b>Main results</b>           | <b>Reference</b> |
|---------------------------------------------------------------|-------------------|-------------------------------|------------------|
| French forest                                                 | Field             | Successional stages           | 226              |
| China forest                                                  | Field             | Community composition         | 227              |
| North American wetlands                                       | Field             | Community composition         | 228              |
| Argentina shrubland                                           | Field             | Increases diversity           | 229              |
|                                                               | Review            | Community composition         | 230              |
|                                                               | Review            | Community composition         | 231              |
| Alaska plant communities                                      | Field             | Community composition         | 232              |
| Australian Shrubland and forest                               | Field             | Community composition         | 233              |
| Tropical forest of Costa Rica                                 | Field             | Community composition         | 234              |
|                                                               | Greenhouse        | Community composition         | 235              |
|                                                               | Metadata analysis | Community composition         | 236              |
|                                                               | Microcosm         | Community composition         | 237              |
| Hawaiian forest                                               | Field             | Community composition         | 238              |
| Belvidere Bog (Vermont)                                       | Field             | Changes trophic web structure | 239              |

**Supplementary Table S18.** Detailing results shown in Fig. 4. Relationships of increases in organisms N:P ratio with ecosystem functional traits.

| Species and/or community studies and pollutant sources | Study site | Main results                                                                | Reference |
|--------------------------------------------------------|------------|-----------------------------------------------------------------------------|-----------|
| Colorado forest                                        | Field      | Nutrient cycling                                                            | 240       |
| European Sphagnum communities                          | Field      | Nutrient cycling                                                            | 241       |
| Tropical forest (Panama)                               | Field      | Water use-efficiency                                                        | 96        |
|                                                        | Greenhouse | Changes in the relationships between photosynthetic capacity and production | 242       |
| Wetland (New Zealand)                                  | Field      | Nutrient cycling                                                            | 243       |
| Belvidere Bog (Vermont)                                | Field      | Changes in nutrient transfer throughout trophic web                         | 239       |

**Supplementary Table S19.** Parameters used to produce the threshold plots in Fig. 5. The range of the parameter values were used to estimated uncertainty in model exceedance for the phosphorus and nitrogen thresholds. Note that the phosphorus fluxes correspond to Fig. 2 of this study.

| Parameter        | Value                             | Sensitivity                                                             | Description                                                                                                                                                                                                                                                                                                             | Reference Number |
|------------------|-----------------------------------|-------------------------------------------------------------------------|-------------------------------------------------------------------------------------------------------------------------------------------------------------------------------------------------------------------------------------------------------------------------------------------------------------------------|------------------|
| $P_w$            | 6502:1                            | See $P_{aw}$                                                            | C:P mass ratio for wood                                                                                                                                                                                                                                                                                                 | 71               |
| $P_a$            | 407:1                             | See $P_{aw}$                                                            | C:P mass ratio for active tissues                                                                                                                                                                                                                                                                                       | 71               |
| $P_{aw}$         | 3454:1                            | 50%                                                                     | C:P mean mass ratio for vegetation assuming 50:50 split of $P_a$ and $P_w$                                                                                                                                                                                                                                              |                  |
| $P_s$            | 50:1                              | 50%                                                                     | C:P mass ratio for soil carbon                                                                                                                                                                                                                                                                                          | 244              |
| $NP_w$           | 16:1                              | 50%                                                                     | N:P mass ratio for wood                                                                                                                                                                                                                                                                                                 | 71               |
| $NP_s$           | 5:1                               | 50%                                                                     | N:P mass ratio for soil                                                                                                                                                                                                                                                                                                 | 245              |
| $N_{deposition}$ | Lower: 0.52<br>Upper: 2.98+0.27/2 | Lower and upper bounds                                                  | Accumulation of N from atmospheric deposition (Pg N), (adjusted so that the estimate reflects the 5–10% actually used by plants) including a correction of 0.27/2 to account for reduced leaching losses (where the total 0.27 Pg N reduced leaching loss is split between $N_{deposition}$ and $N_{fixation}$ , below) | 7                |
| $N_{fixation}$   | Lower: 0.64<br>Upper: 2.87+0.27/2 | Lower and upper bounds                                                  | Accumulation of N from biological fixation (Pg N), including a correction of 0.27/2 to account for reduced leaching losses                                                                                                                                                                                              | 7                |
| $N_{total}$      | Lower: 1.16<br>Upper: 6.12        | Upper and lower bounds                                                  | Total accumulation of $N_{deposition}$ and $N_{fixation}$ (Pg N)                                                                                                                                                                                                                                                        | 7                |
| $P_{labile}$     | 13.2                              | 0.4 (lower bound only)                                                  | Size of labile P pool (Pg P) assuming 2–20% availability of the lower and upper total soil P pool in Fig. 1 (40–200 Pg P).                                                                                                                                                                                              | This study       |
| $P_{dust}$       | 0.0031                            | None                                                                    | Rate of mean of atmospheric dust deposition uncertainty (Pg P yr <sup>-1</sup> ). Assumed constant for 21 <sup>st</sup> century accumulation.                                                                                                                                                                           | 3                |
| $P_{fertilizer}$ | 0.024                             | None                                                                    | Sum of industrial and manure P additions (Pg P yr <sup>-1</sup> ). Assumed constant until 2050, then reduced to 30% for 2050 to 2099 for accumulation calculation                                                                                                                                                       | This study       |
| $P_{weathering}$ | 0.01                              | 10% increase over 100 years                                             | Rate of release from weathering of parent material (Pg P yr <sup>-1</sup> ) estimated as the mean of upper and lower bounds in Fig. 1, 0.002 and 0.02 (Pg P yr <sup>-1</sup> ). Accumulation for 2099 assumes a 10% increase (0.1% per year) due to climate and enzymatic-related increases in weathering.              | This study       |
| $P_{leaching}$   | 0.014                             | None                                                                    | Rate of leaching losses (Pg P yr <sup>-1</sup> ).                                                                                                                                                                                                                                                                       | 246              |
| $P_{landuse}$    | 0.022                             | Not included in threshold calculation (approx. equal to $P_{rivers}$ )  | Rate of production from land use change (Pg P yr <sup>-1</sup> ).                                                                                                                                                                                                                                                       |                  |
| $P_{rivers}$     | 0.0325                            | Not included in threshold calculation (approx. equal to $P_{landuse}$ ) | Rate of loss to rivers (Pg P yr <sup>-1</sup> ). Mean of 19 and 46 PgP yr <sup>-1</sup> in Fig. 2.                                                                                                                                                                                                                      |                  |
| $P_{occlusion}$  | 0.002                             | None                                                                    | Rate of P bound to soil and unavailable to plants (Pg P yr <sup>-1</sup> ).                                                                                                                                                                                                                                             | 246              |

*Notice that for the estimates in change in P and N demand, the fluxes are calculated over a 100 year time span and are compared with changes in terrestrial carbon over the same time period. Because the accumulation of carbon is quite non-linear due to increasing CO<sub>2</sub> fertilization effects a per year flux could be misleading.*

**Supplementary Table S20. List of models available from the PCMDI node of the Earth System Grid Federation.**

The list represents only those models where both soil and vegetation carbon stocks were available. The RCP simulations begin in 2006 and with all model simulations edited to end in common year 2099. Litter and product pool carbon were not available as separate variables for all models and it was assumed in these cases that either the litter carbon pool was already merged with soil carbon, or that land-cover change was not included in the model simulation. The ensemble mean was calculated in cases where more than one model simulation was provided.

| Model ID | Model Name     | Ensemble (n) | RCP 2.6  |        |          | RCP 8.5  |        |          |
|----------|----------------|--------------|----------|--------|----------|----------|--------|----------|
|          |                |              | Veg+Soil | Litter | Products | Veg+Soil | Litter | Products |
| 1        | CanESM2        | 5            | ✓        | ✓      |          | ✓        | ✓      |          |
| 2        | CCSM4          | 6            | ✓        | ✓      | ✓        | ✓        | ✓      | ✓        |
| 3        | CESM1 BGC      | 1            |          |        |          | ✓        | ✓      | ✓        |
| 4        | CESM1 CAM5     | 3            | ✓        | ✓      | ✓        | ✓        | ✓      | ✓        |
| 5        | CESM1          | 3            | ✓        | ✓      | ✓        | ✓        | ✓      | ✓        |
|          | WACCM          |              |          |        |          |          |        |          |
| 6        | CMCC CESM      | 1            |          |        |          | ✓        |        |          |
| 7        | GFDL ESM2G     | 1            | ✓        |        | ✓        | ✓        |        | ✓        |
| 8        | GFDL ESM2M     | 1            |          |        |          | ✓        |        | ✓        |
| 9        | HadGEM2 CC     | 3            |          |        |          | ✓        |        | ✓        |
| 10       | HadGEM2 ES     | 4            | ✓        |        | ✓        | ✓        |        | ✓        |
| 11       | INMCM4         | 1            |          |        |          | ✓        |        | ✓        |
| 12       | IPSL CM5A LR   | 4            | ✓        | ✓      | ✓        | ✓        | ✓      | ✓        |
| 13       | IPSL CM5A MR   | 1            | ✓        | ✓      | ✓        | ✓        | ✓      | ✓        |
| 14       | IPSL CM5B LR   | 1            |          |        |          | ✓        | ✓      | ✓        |
| 15       | MIROC ESM CHEM | 1            | ✓        | ✓      | ✓        | ✓        | ✓      | ✓        |
| 16       | MIROC ESM      | 1            | ✓        | ✓      | ✓        | ✓        | ✓      | ✓        |
| 17       | MPI ESM LR     | 3            | ✓        | ✓      |          | ✓        | ✓      |          |
| 18       | MPI ESM MR     | 1            | ✓        | ✓      |          | ✓        | ✓      |          |
| 19       | NorESM1 ME     | 1            | ✓        | ✓      |          | ✓        | ✓      |          |
| 20       | NorESM1 M      | 1            | ✓        | ✓      |          | ✓        | ✓      |          |
| 21       | SP CCSM4       | 1            |          |        |          | ✓        | ✓      | ✓        |



**Supplementary Table S21. Detailing the data used to update the phosphorus cycle shown in Figure 2.**

| Study Type               | P fluxes in Tg yr <sup>-1</sup> and stocks in Tg                                                                                                                                                                                                                                                                                     | Reference |
|--------------------------|--------------------------------------------------------------------------------------------------------------------------------------------------------------------------------------------------------------------------------------------------------------------------------------------------------------------------------------|-----------|
| Review and modeling data | Global P deposition 0.56 (oceans)                                                                                                                                                                                                                                                                                                    | 3         |
| Review                   | Global P deposition 3 (continents), 0.3 (oceans)                                                                                                                                                                                                                                                                                     | 4         |
| Review                   | Terrestrial fluxes to ocean 19<br>Dissolved P in Ocean surface 2600<br>Ocean biota P content 50<br>Dissolved P in Ocean deep waters 80000<br>Annual coast detrital P 19<br>P content in terrestrial plants 2400-3000<br>Annual P extracted from mines 12-17<br>Plants uptake 600<br>P in litter 600<br>Annual P rock weathering 2-20 | 45        |
| Review                   | Ocean biota 50-140                                                                                                                                                                                                                                                                                                                   | 67        |
| Review                   | Commercial fertilizer application 14.2<br>Livestock slurry plus crop manure application as fertilizers 9.8                                                                                                                                                                                                                           | 68        |
| Review and modeling data | Terrestrial fluxes to ocean 46<br>Human driven P leaching from land 13.5-25<br>Fertilizer leaching 5<br>Land use 20<br>Annual P extracted from mines 17                                                                                                                                                                              | 70        |
| Review                   | Annual P sediment in deep Ocean 4.7-6 (2-3 from natural origin and 2-3 from human activities)<br>Total P in soils 120000<br>Land use 20<br>Plants P uptake 200<br>P in litter 200<br>P in sedimentary reservoir 8400000000                                                                                                           | 247       |
| Review                   | P in low latitude croplands 9.81-11.61<br>P in Mid and high latitude croplands 11.99-14.19                                                                                                                                                                                                                                           | 248       |
| Review                   | Terrestrial fluxes to ocean 46<br>P in aerosols 3<br>Annual P deposited in coastal sediments 46<br>P dissolved in deep ocean waters 120000<br>P in terrestrial plants 500-3000<br>P in terrestrial animals 30-50<br>P in humans 3<br>P in atmospheric deposition 3-3.2<br>Stable organic P in soils 600-7400                         | 249       |
| Review                   | Mineable P reserves (economic viable with current prices) 1400-3200<br>(potentially exploitable) 4400-8800                                                                                                                                                                                                                           | 250       |
| Review                   | P atmospheric deposition in oceans 1<br>Terrestrial fluxes to ocean 22<br>Human driven P leaching from land 13.5<br>Total terrestrial fluxes to ocean 22<br>Fluxes to ocean of human origin 13.5<br>Annual P accumulated in deep ocean sedimentary areas 4.7<br>Annual P fluxes in ocean 100                                         | 251       |

|                    |                                                                                                                                                                                                                                                                                                                                                                                                |     |
|--------------------|------------------------------------------------------------------------------------------------------------------------------------------------------------------------------------------------------------------------------------------------------------------------------------------------------------------------------------------------------------------------------------------------|-----|
| Review             | Dissolved P in Ocean surface 2700<br>Ocean biota P content 140<br>Dissolved P in Ocean deep waters 87000<br>P in sedimentary reservoirs 4000000000<br>Annual rock weathering 10-30<br>Atmospheric P deposition on oceans 1<br>Atmospheric P deposition on continents 3.2<br>Annual P mined 19.8<br>Annual P in fertilizers 17<br>Total P in soils 200000<br>Total P in terrestrial plants 3000 | 252 |
| Experimental study | Labile soil P 2-20% of total soil P<br>Dissolved P-immediately available to plants 1-4% of total soil P                                                                                                                                                                                                                                                                                        | 253 |
| Experimental study | Labile soil P 2-20% of total soil P<br>Dissolved P-immediately available to plants 1-4% of total soil P                                                                                                                                                                                                                                                                                        | 254 |
| Review             | Stable inorganic P in soil 36000                                                                                                                                                                                                                                                                                                                                                               | 255 |

## Supplementary Methods

### Estimating nutrient demand for the changes in vegetation and soil carbon stocks between 2000 and 2099

We estimated the change in demand for phosphorus and nitrogen considering changes in vegetation and soil carbon stocks projected by the C4MIP and CMIP5 earth system models to occur between the years 2000 and 2099, after applying C:P and N:P ratios from a literature survey to active tissues (leaves and fine roots), wood, and soil carbon pools. The C4MIP and CMIP5 models were used in the Fourth and Fifth Assessment Reports of the Intergovernmental Panel on Climate Change (IPCC). After estimating global phosphorus and nitrogen demand, the change in demand for phosphorus and nitrogen was regionalized from the original gridded data for CMIP5 or based on land area and known fractional distributions of global biomass stocks<sup>256</sup> in the case where gridded data were not available for the C4MIP models. To estimate nutrient demand for croplands, we used cereal-crop yield projections from the Millennium Ecosystem Assessment (MA) report<sup>257</sup> implementing a similar stoichiometric approach as used for the earth system model analysis (both described in detail below).

A sensitivity analysis was also carried out to evaluate C:P and N:P ratio uncertainties, assuming that plants have some adaptive flexibility, including changes in nutrient resorption efficiency<sup>258</sup> as resources become progressively limiting by adjusting the ratios by 50%, based on experimental evidence<sup>259</sup> and the range of uncertainty. In addition, we modified the rate of phosphorus release from weathering of parent material assuming sensitivity to changes in climate or sensitivity to changes in the rate of turnover of immobilized phosphorus via CO<sub>2</sub>-enhanced root exudation of the phosphatase enzyme<sup>260</sup>, or from potentially faster rates of organic matter decomposition from phosphorus stored in high-latitude soils<sup>261</sup>. The results from the sensitivity analysis showed that the estimate in the change in N and P demand were a much smaller source of uncertainty than the assumptions for the nutrient supply. The labile-phosphorus pool exists as an additional source of uncertainty because while it represents phosphorus that can easily move among plants, microbes, and soluble and mineralized organic pools<sup>32</sup>, field observations demonstrate much of this labile-phosphorus pool is unavailable for increased plant uptake because it is immobilized in microbial biomass. To address this uncertainty, we assumed for the standard scenario that this P pool was unavailable, but provided an alternative scenario where we assumed that the pool was available for plant uptake. Following the approach of Hungate *et al.*<sup>7</sup>, for nitrogen, only net fluxes of nitrogen from increased nitrogen deposition and fixation were considered.

The values used for the nutrient ratios, nutrient inputs and pools, and assumptions for the regionalization of the C4MIP global values are presented in Table S2. First, the potential change in carbon stock between the years 2000 (2006 for CMIP5) and 2099 was estimated for vegetation and soils, in absence of nutrient limitation:

$$\Delta_{Cveg} = Cveg_{2099} - Cveg_{2000} \quad (1)$$

$$\Delta_{Csoil} = Csoil_{2099} - Csoil_{2000} \quad (2)$$

For the standard scenario, fixed, global C:P and N:P ratios from literature were used to scale changes in vegetation and soil phosphorus and nitrogen nutrient demand from the potential change in carbon stocks (Table 1):

$$\Delta_{Pveg} = \Delta_{Cveg} P_{aw} \quad (3)$$

$$\Delta_{Nveg} = \Delta_{Pveg} NP_w \quad (4)$$

$$\Delta_{Psoil} = \Delta_{Csoil} P_s \quad (5)$$

$$\Delta_{Nsoil} = \Delta_{Psoil} NP_s \quad (6)$$

Based on these estimates for the change in phosphorus and nitrogen, we derived an independent value for vegetation C:N mass ratio of 221 and a soil C:N mass ratio of 8.5, which was close to observed ratios<sup>7,71</sup> and confirms the consistency of the choice of C:P and N:P ratios with previous studies. For example, in the study of Hungate et al.<sup>7</sup> a vegetation C:N ratio of 200 and a soil C:N ratio of 15 was used to estimate N demand from changes in carbon stocks.

For C4MIP, where only the global values were available, the global nutrient demand was separated into two regions by partitioning the change in vegetation carbon ( $C_{veg}$ ) and the related phosphorus and nitrogen demand as 55% to tropical and 45% to extratropical biomass<sup>253</sup>. For soils in both CMIP experiments, we considered mineral carbon only (excluding peatlands), and in C4MIP separated the change in global soil-carbon stock to 10.5% tropical (based on biome area in Zhao and Running, 2010<sup>262</sup>), and 89.5% extratropical.

The total global and regional terrestrial phosphorus and nitrogen demand change was estimated as the sum of the soil and vegetation nutrient demand:

$$\Delta_{Ptotal} = \Delta_{Pveg} + \Delta_{Psoil} \quad (7)$$

$$\Delta_{Ntotal} = \Delta_{Nveg} + \Delta_{Nsoil} \quad (8)$$

Four socio-economic development projections of cereal-crop yields for the year 2050 from the Millennium Ecosystem Assessment (MA)<sup>257</sup> were used to estimate future phosphorus and nitrogen demand. In the Millennium Ecosystem Assessment, an Integrated Assessment model was used to estimate future crop yields based on projections of gross domestic product (GDP), population growth and other variables from their relationships with food production. To reduce uncertainties in our stoichiometric approach for estimating crop-phosphorus demand, we calculated a global cropland C:P ratio from more detailed crop-based assessments of global total food production phosphorus demand

(12.3 Tg P yr<sup>-1</sup>) from MacDonald et al.<sup>68</sup> (2011) and nitrogen demand (88.1 Tg N yr<sup>-1</sup> or 55% of 148 Tg N yr<sup>-1</sup>) from Liu et al.<sup>263</sup>. Using the year 2000 global food production from MA of 1568.7 Tg C yr<sup>-1</sup> (including cereals, maize, rice, tubers/roots, oil crops, and pulse crops) resulted in ratios of 127:1 for C:P and 18:1 for C:N; these ratios were then used to estimate nutrient demand in the four 2050 scenarios.

### **Estimating nutrient supply for the changes in vegetation and soil carbon stocks between 2000 and 2099**

The change in nitrogen supply was estimated from changes in the accumulation of plant-available N-deposition (where only 5-10% of total deposited nitrogen becomes plant available) and N-fixation (where Hungate et al.<sup>7</sup> assumed a low (10%) and high (45%) scenario for increased N-fixation under elevated CO<sub>2</sub>), while accounting for declines in leaching from increased plant uptake, following the approach of Hungate et al.<sup>7</sup>. We split the global estimate of N-deposition to 80% extratropical and 20% tropical<sup>10</sup>, while N-fixation was split based on observed relative biome contributions to global N-fixation as estimated by Cleveland et al.<sup>264</sup>, with 50% occurring in the tropics, 50% in extratropics. These assumptions led to a global increase from 2000-2099 in plant available nitrogen between 1.2 to 6.1 Pg N and an increase of 0.7-3.9 Pg N for extratropical and 0.4 to 2.1 Pg N for tropical regions. We did not consider changes in nitrogen supply for croplands and assumed that nitrogen demand is relatively unconstrained by the large supply of atmospheric N<sub>2</sub> available to sustain the Haber-Bosch process (fertilizer production) into the future<sup>1</sup>.

The change in phosphorus supply was estimated from the global phosphorus pools and fluxes presented in Fig. 2. Previous observations and modelling have shown that phosphorus uptake tends to be less than measured available labile phosphorus, despite terrestrial phosphorus limitation being observed across many ecosystems – as evidenced by high C:P ratios and from fertilization studies<sup>8, 62,265</sup>. The dynamics of the labile-phosphorus pool remain quite uncertain but it is considered to be unavailable to plants due to competition with microbial uptake<sup>32,266</sup>. To address this uncertainty, in our standard scenario we assumed that the labile pool was inaccessible and instead assumed that the net accumulation of inputs of phosphorus during 2000–2099 resulted from global dust inputs (3.1 Tg P yr<sup>-1</sup>), weathering (11.0 Tg P yr<sup>-1</sup>), and increased turnover or access to deeper soil-phosphorus reserves<sup>261</sup> assuming a highly uncertain annual increase in access to these pools of 0.1% per year<sup>267</sup> or 10% over 100 years. Losses of soil phosphorus were calculated for leaching (32.5 Tg P yr<sup>-1</sup>), wind erosion (3.0 Tg P yr<sup>-1</sup>), and occlusion (2.0 Tg P yr<sup>-1</sup>), the process of phosphorus adsorption into clay structure,<sup>267,268</sup> and precipitation in salts of iron and calcium), assuming that present-day rates remain constant. All global phosphorus weathering and dust inputs, and leaching losses were scaled to regional fluxes by the regional land fractions (i.e., 11% for tropics and 89% for extratropics). For the labile-phosphorus pool, the global value was first estimated as 13.2 Pg P, the product of the mean of the low and high values total P pool values presented in Figure 2 (40-200 Pg P, average 120 Pg P) and the percentage of this pool

assumed to be labile P (2-20%, average 11%). The global value was weighted by both land area and by regional soil-phosphorus concentrations (28 mg P kg<sup>-1</sup> soil for tropical biomes and 43.6 mg P kg<sup>-1</sup> soil for the extra-tropical system) as compiled by Johnson et al.<sup>266</sup>. The following equation estimates the net change in global terrestrial phosphorus supply for 100 years ( $y$ ) assuming a 10% increase in weathering rates over this time period.

$$\Delta P_{global supply} = y * (P_{weathering} + P_{dust} + P_{fertilizer}) - y * (P_{leaching} + P_{occlusion} + P_{aerosols}) \quad (9)$$

Because of uncertainties in changes in future phosphorus fertilizer additions for croplands<sup>269,270</sup>, we took a different approach. We assumed that the rate of phosphorus demand increased annually at an exponential rate from the estimated phosphorus demand from crop yield in 2000 and crop yield in 2050. Integrating the phosphorus demand over this time period yielded the total phosphorus that would need to be mined or applied from manure to sustain global food production (cereals and pulse crops, oil and roots/tubers) for the next 50 years. The range of phosphorus extraction was compared to the upper and lower mineable-phosphorus estimates in Fig. 2 (1400 to 3200 Tg P) to identify the approximate year when 50% depletion would occur. Based on the MA projections for regional changes in cereal crop yields (6 economic zones; OECD, Asia, Russia, Sub-Saharan Africa, and Northern Africa and Middle East were considered), we estimated the phosphorus demand for 2000 and 2050 (with a C:P ratio of 127:1) and calculated the present-day phosphorus inputs from fertilizer and manure from the gridded data of Potter and Ramankutty<sup>271</sup>.

## Supplementary References

71. Kattge, J. *et al.* TRY – a global database of plant traits. *Global Change Biol.* **17**, 2905-2935 (2011).
72. Elser, J. J., Kyle, M., Steger, L., Nydick, K. R. & Baron, J. S. Nutrient availability and phytoplankton nutrient limitation across a gradient of atmospheric nitrogen deposition. *Ecology* **90**, 3062-3073 (2009a).
73. Elser, J. J. *et al.* Atmospheric nitrogen deposition is associated with elevated phosphorus limitation of lake zooplankton. *Ecol. Lett.* **13**, 1256-1261 (2010).
74. Hessen, D.O., Andersen, T., Larsen, S., Skjelkvale, B. L. & de Wit, H.A. Nitrogen deposition, catchment productivity, and climate as determinants of lake stoichiometry. *Limnol. Oceanogr.* **54**, 2520-2528 (2009).
75. Jassby, A. D., Reuter, J. E., Axler, R. P., Goldman, C. R. & Hackley, S. H. Atmospheric deposition of nitrogen and phosphorus in the annual nutrient load of lake Tahoe (California Nevada). *Water Resour. Res.* **30**, 2207-2216 (1994).
76. Liess, A., Drakare, S. & Kahlert, M. Atmospheric nitrogen-deposition may intensify phosphorus limitation of shallow epilithic periphyton in unproductive lakes. *Freshwater Biol.* **54**, 1759-1773 (2009).
77. Bizsel, N. & Uslu, O. Phosphate, nitrogen and iron enrichment in the polluted Izmir Bay, Aegean Sea. *Mar. Environ. Res.* **49**, 101-122 (2000).
78. Capriulo, G. M. *et al.* The planktonic food web structure of a temperate zone estuary, and its alteration due to eutrophication. *Hydrobiologia* **475**, 263-333 (2002).
79. Chai, C., Yu, Z., Song, X. & Cao, X. (2006) The status and characteristics of eutrophication in the Yangtse river (Changjiang) Estuary and the adjacent East China sea, China. *Hydrobiologia* **563**, 313-328 (2006).
80. Fisher, T. R., Hagy III, J. D., Boyton, W. R. & Williams, M. R. Cultural eutrophication in the Choptank and Patuxent estuaries of Chesapeake Bay. *Limnol. Oceanogr.* **51**, 435-447 (2006).

81. Gachter, R., Steingruber, S. M., Reinhardt, M. & Wehrli, B. Nutrient transfer from soil to surface waters: Differences between nitrate and phosphate. *Aquatic Sci.* **66**, 117-122 (2004).
82. Glibert, P. M., Fullerton, D., Burkholger, J. M., Cornwell, J. C. & Kana, T. M. Ecological stoichiometry, biogeochemical cycling, invasive species, and aquatic food webs: San Francisco estuary and comparative systems. *Rev. Fisheries Sci.* **18**, 358-412 (2011).
83. Grzetic, Z., Precali, R., Degobbis, D. & Skrivanic, A. Nutrient enrichment and phytoplankton response in an Adriatic karstic estuary. *Mar. Chem.* **32**, 313-331 (1991).
84. Harrison, P.J., Yin, K.D., Lee, J.H.W., Gan, J.P. & Liu, H.B., Physical-biological coupling in the Pearl River Estuary. *Cont. Shelf Res.* **28**, 1405-1415 (2008).
85. Hessen, D. O., Hindar, A. & Holtan, G. The significance of nitrogen runoff for eutrophication of freshwater and marine recipients. *Ambio* **26**, 312-320 (1997).
86. Huang, X. P., Huang, L. M. & Yue, W. Z. The characteristics of nutrients and eutrophication in the Pearl river estuary, South China. *Mar. Pollut. Bull.* **47**, 30-36 (2003).
87. Jickells, T. D. Nutrient biogeochemistry of the coastal zone. *Science* **281**, 217-222 (1998).
88. Johnson, M. W., Heck Jr. K. L. & Fourqurean, J. W. Nutrient content of seagrasses and epiphytes in the northern Gulf of Mexico: evidence of phosphorus and nitrogen limitation. *Aquat. Bot.* **85**, 103-111 (2006).
89. Justic, D., Rabalais, N. N. & Turner, R. E. Stoichiometric nutrient balance and origin of coastal eutrophication. *Mar. Pollut. Bull.* **30**, 41-46 (1995).
90. Kontas, A., Kucuksezgin, F., Altay, O. & Uluturhan, E. Monitoring of eutrophication and nutrient limitation in the Izmir Bay (Turkey) before and after Wastewater treatment plant. *Environ. Intern.* **29**, 1057-1062 (2004).
91. Hickel, W., Mangelsdorf, P. & Berg, J. The human impact in the German bight – eutrophication during 3 decades (1962-1991). *Helgolander Meeresuntersuchungen* **27**, 243-263 (1992).



92. Kress, N., Coto, S. L., Brenes, C. L., Brenner, S. & Arroyo, G. Horizontal transport and seasonal distribution of nutrients, dissolved oxygen and chlorophyll-a in the Gulf of Nocoya, Costa Rica: a tropical estuary. *Continental Shelf Res.* **22**, 51-66 (2002).
93. Li, Y. *et al.* Long-term changes in the Changjiang estuary plankton community related anthropogenic eutrophication. *Aquat. Ecosys. Health Manag.* **13**, 66-72 (2010).
94. Lipizer, M., Cossarini, G., Falconi, C., Solidoro, C. & Umani, S. F. Impact of different forcing factors on N:P balance in a semi-enclosed bay: The Gulf of Trieste (North Adriatic Sea). *Continental Shelf Res.* **31**, 1651-1662 (2011).
95. Nagy, G. J., Gómez-Erache, M., López, C. H. & Perdomo, A. C. Distribution patterns of nutrients and symptoms of eutrophication in the Rio de la Plata river estuary system. *Hydrobiologia* **475**, 125-139 (2002).
96. Nedwell, D. B., Dong, L. F., Sage, A. & Underwood, G. J. C. Variations of the nutrients loads to the Mainland U.K. estuaries: correlation with catchments areas, urbanization and coastal eutrophication. *Estuarines Coastal Shelf Sci.* **54**, 951-970 (2002).
97. Prasad, M. B. K. Nutrient stoichiometry and eutrophication in Indian mangroves. *Environ. Earth Sci.* **67**, 293-299 (2012).
98. Ptacnik, R., Jenerette, D., Verschoor, A. M., Huberty, A. F., Solimini, A. G. & Brookes, J. D. Applications of ecological stoichiometry for sustainable acquisition of ecosystem services. *Oikos* **109**, 52-62 (2005).
99. Radach, G. & Pätsch, J. Variability of continental riverine freshwater and nutrient inputs into the north sea for the years 1977-2000 and its consequences for the assessment of eutrophication. *Estuaries Coast* **30**, 66-81 (2007).
100. Santos, I. R., Costa, R. C., Freitas, U. & Fillmann, G. Influence of effluents from a Wastewater Treatment Plant on nutrient distribution in a coastal creek from southern Brazil. *Brazilian Arch. Biol. Technol.* **51**, 153-162 (2008).
101. Shen, Z. L. & Liu, Q. Nutrients in the Changjiang River. *Environ. Monit. Assess.* **153**, 27-44 (2009).

102. Turner, R. E., Rabalais, N. N. & Justic, D. Predicting summer hypoxia in the northern Gulf of Mexico: Riverine N, P, and Si loading. *Mar. Pollut. Bull.* **52**, 139-148 (2006).
103. Vanni, M. J., Renwick, W. H., Bowling, A. M., Horgan, M. J. & Christian, A. D. Nutrient stoichiometry of linked catchment-lake systems along a gradient of land use. *Freshwater Biol.* **56**, 791-811 (2011).
104. Von Sperling, E. & Souza, A. D. Long-term monitoring and proposed diffuse pollution control of a tropical reservoir. *Water Sci. Techn.* **55**, 161-166 (2007).
105. Von Sperling, E., da Silva Ferreira, A. C. & Ludolf Gomes, L. N. Comparative eutrophication development in two Brazilian water supply reservoirs with respect to nutrient concentrations and bacteria growth. *Desalination* **226**, 169-174 (2008).
106. Wang, J., Yang Z. F., Pei, Y. S. & Cui, Q. A. Effects of nutrient concentrations and ratios on the eutrophication in a macrophyte-dominated lake. *Fres. Environ. Bull.* **19**, 2185-2191 (2010).
107. Wei, P. & Huang, L. M. Water quality and eutrophication in the Guangzhou Sea Zone of the Pearl River estuary. *Chin. J. Oceanol. Limnol.* **28**, 113-121 (2010).
108. Xu, J., Ho, A. Y. T., Yin, K., Yuan, X., Anderson, D. M., Lee, J. H. W. & Harrison, P. J. Temporal and spatial variations in nutrient stoichiometry and regulation of phytoplankton biomass in Hong Kong waters influence of the Pearl River outflow and sewage inputs. *Mar. Pollut. Bull.* **57**, 335-348 (2008).
109. Xu, J., Gilbert, P. M., Liu, H., Yin, K., Yuan, X., Chen, M. & Harrison, P. J. Nitrogen sources and rates of phytoplankton uptake in different regions on Hong Kong waters in summer. *Estuaries Coast* **35**, 559-571 (2012).
110. Yin, K. & Harrison, P. J. Influence of the Pearl River estuary and vertical mixing in Victoria Harbor on water quality in relation to eutrophication impacts in Hong Kong waters. *Marine Pollut. Bull.* **54**, 646-656 (2007).
111. Yin, K., Song, X., Sun, J. & Wu, M. C. S. Potential P limitation leads to excess N in the pearl river estuarine coastal plume. *Continental Shelf Res.* **24**, 1895-1907 (2004).
112. Cáceres, C.E., Tessier, A.J., Andreou, A. & Duffy, M.A. Stoichiometric relationships in vernal pond plankton communities. *Freshw. Biol.* **53**, 1291-1302 (2008).

113. El-Sabaawi, R. W. *et al.* Environmental and organismal predictors of intra-specific variation in the stoichiometry of a neotropical freshwater fish. *Plos One* **7**, e32713 (2012).
114. Hall, S. R., Smith, V. H., Lytle, D. A. & Leibold, M. A. Constraints on primary producer N:P stoichiometry along N:P supply ratio gradients. *Ecology* **86**, 1894-1904 (2005).
115. Makino, W., Cotner, J. B., Sterner, R. W. & Elser, J. J. Are bacteria more like plants or animals? Growth rate and resource dependence of bacterial C : N : P stoichiometry. *Funct. Ecol.* **17**, 121-130 (2003).
116. McNulty, S. G., Aber, J. D. & Boone, R. D. Spatial Changes in Forest Floor and Foliar Chemistry of Spruce-Fir Forests Across New-England. *Biogeochemistry* **14**, 13-29 (1991).
117. Townsend, S.A., Schult, J. H., Douglas, M. M. & Skinner, S. Does the Redfield ratio infer nutrient limitation in the macroalga *Spirogyra fluviatilis*? *Freshwater Biol.* **53**, 509-520 (2008).
118. Vrede, T. *et al.* Ecological stoichiometry of Eurasian perch – intraspecific variation due to size, habitat and diet. *Oikos* **120**, 886-896 (2011).
119. Fulton, B. A., Brain, R. A., Usenko, S., Back, J. A., King, R. S. & Brooks, B. W. Influence of nitrogen and phosphorus concentrations and ratios on Lemna Gibra growth responses to Triclosan in laboratory and stream mesocosm experiments. *Environ. Toxicol. Chem.* **28**, 2610-2621 (2009).
120. Holl, G. M. & Montoya, J. P. Diazotrophic growth of the marine *Cyanobacterium Trichodesmium* IMS101 in continuous culture: effects of growth rate on N<sub>2</sub>-fixation rate, biomass, and C:N:P stoichiometry. *J. Phycol.* **44**, 929-937 (2008).
121. Timmermans, K. R. & van der Wagt, B. Variability in cell size, nutrient depletion, and growth rates of the southern ocean diatom *Fragilariopsis kerguelensis* (Bacillariophyceae) after prolonged iron limitation. *J. Phycol.* **46**, 497-506.
122. Carrillo, P., Villar-Argaiz, M. & Medina-Sánchez, J. M. Does microorganism stoichiometry predict microbial food web interactions after a phosphorus pulse? *Microb. Ecol.* **56**, 350-363 (2008).
123. Demars, O. L. & Edwards, A. C. Tissue nutrient concentrations in aquatic macrophytes: comparison across biophysical zones, surface water habitats and plant life forms. *Chem. Ecol.* **24**, 413-422 (2008).

124. Dobberfuhl, D. R. & Elser, J. J. Elemental stoichiometry of lower food web components in arctic and temperate lakes. *J. Plank. Res.* **22**, 1341-1354 (2000).
125. Elser, J. J. & Foster, D. K. N:P stoichiometry of sedimentation in lakes of the Canadian shield: relationships with seston and zooplankton elemental composition. *Ecoscience* **5**, 56-63 (1998).
126. Elser, J. J., Chrzamowski, T. H., Sterner, R. W. Schampel, J. H. & Foster, D. K. Elemental ratios and the uptake and release of nutrients by phytoplankton and bacteria in three lakes of the Canadian shield. *Microb. Ecol.* **25**, 145-162 (1995).
127. Elser, J. J., O'Brien, W. J., Dobberfuhl, D. R. & Dowling, T. E. The evolution of ecosystem processes: growth rate and elemental stoichiometry of a key herbivore in temperate and arctic habitats. *J. Evol. Biol.* **13**, 845-853 (2000).
128. Gilbert, P. M., Burkholder, J. M. & Kana, T. M. Recent insights about relationships between nutrient availability, forms, and stoichiometry, and the distribution, ecophysiology, and food web effects of pelagic and benthic *Prorocentrum* species. *Harmful Algae* **14**, 231-259 (2012).
129. Goldyn, R., Podsiadlowski S., Kowalczevska, R., Szalag-Wasielewska, E., Budzynska, A., Domek, P. & Romanowicz-Brzozowska W. Functioning of the Lake Rusalka ecosystem in Poznan (western Poland). *Oceanol. Hydrobiol. Studies* **39**, 65-80 (2010).
130. Hassett, R. P., Cardinale, B., Stabler, L. B. & Elser, J. J. Ecological stoichiometry of N and P in pelagic ecosystems: comparison of lakes and oceans with emphasis on the zooplankton-phytoplankton interaction. *Limnol. Oceanogr.* **42**, 648-662 (1997).
131. Hillebrand, H. Temperature mediates competitive exclusion and diversity in benthic microalgae under different N:P stoichiometry. *Ecol. Res.* **26**, 533-539 (2011).
132. Laflaive, J., Danger, M., Lacroix, G., Lyauley, E., Oumarou, C. & Ten-Hage, L. Nutrient effects on the genetic and functional diversity of aquatic bacterial communities. *Fems Microbiol. Ecol.* **66**, 379-390 (2008).
133. Liess, A. & Hillebrand, H. Role of nutrient supply in grazer-periphyton interactions: reciprocal influences of periphyton and grazer nutrient stoichiometry. *J. N. Am. Benthol. Soc.* **25**, 632-642 (2006).

134. Lv, J., Wu, H. J. & Chen, M. Q. Effects of nitrogen and phosphorus on phytoplankton composition and biomass in 15 subtropical, urban shallow lakes in Wuhan, China. *Limnologia* **41**, 48-56 (2011).
135. McCarthy, V. & Iryvine, K. A test of stoichiometry across six Irish lakes of low-moderate nutrient status and contrasting hardness. *J. Plankton Res.* **32**, 15-29 (2010).
136. Riegman, R., Noordeloos, A. A. M. & Cadée, G. C. Phaeocystis blooms and eutrophication of the continental coastal zones of the North sea. *Mar. Biol.* **112**, 479-484 (1992).
137. Sabanci, F. C. & Koray, T. Annual variation in the diversity, species richness and composition of the phytoplankton assemblages in the Izmir Bay (eastern Aegean). *Turkish J. Fish. Aqua. Sci.* **11**, 303-314 (2011).
138. Vrede, T., Ballantyne, A., Mille-Lindblom, C., Algesten, G., Gudas, C., Lindahl, S. & Brunberg, A. K. Effects of N : P loadings ratios on phytoplankton community composition, primary production and N fixation in a eutrophic lake. *Freshwater Biol.* **54**, 331-344 (2009).
139. Artigas, J., Romaní, A. M. & Sabater, S. Relating nutrient molar ratios of microbial attached communities to organic matter utilization in a forested stream. *Fundament. Appl. Limnol.* **173**, 255-264 (2008).
140. Cobelo-García, A., Bernardez, P., Leira, M., López-Sánchez, D. E., Santos-Echeandia, J., Prego, R. & Pérez-Arlucea, M. Temporal and diel cycling of nutrients in a barrier-lagoon complex: implications for phytoplankton abundance and composition. *Estuar. Coastal Shelf Sci.* **110**, 69-76 (2012).
141. Findlay, D. L., Hecky, R. E., Hendzel, L. L., Stainton, M. P. & Regehr, G. W. Relationship between N<sub>2</sub>-fixation and heterocyst abundance and its relevance to the nitrogen budget of lake-227. *Can. J. Fish. Aqua. Sci.* **51**, 2254-2266 (1994).
142. Jankowski, K., Schindler, D. E., Holtgrieve, G. W. & Gordon, W. Assessing nonintrusive-source nitrogen loading and nitrogen fixation in lakes using  $\delta^{15}\text{N}$  and nutrient stoichiometry. *Limnol. Oceanogr.* **57**, 671-683 (2012).
143. Schade, J. D. *et al.* The stoichiometry of nitrogen and phosphorus spiralling in heterotrophic and autotrophic streams. *Freshwater Biol.* **56**, 424-436 (2011).

144. Chetelat, J., Amyot, M. & Cloutier, L. Shifts in elemental composition, methylmercury content and  $\delta^{15}\text{N}$  ratio during growth of a high Arctic copepod. *Freshwater Biol.* **57**, 1228-1240 (2012).
145. Gafner, K. T. & Robinson, C. T. Nutrient enrichment influences the responses of stream macroinvertebrates to disturbance. *J. N. Am. Benthol. Soc.* **26**, 92-102 (2007).
146. Lapointe, B. E., Barile, P. J., Litler, M. M., Litler, D. S., Bedford, B. J. & Gasque, C. Macroalgal blooms on southeast Florida coral reefs I. Nutrient stoichiometry of the invasive green alga *Codium isthmocladum* in the wider Caribbean indicates nutrient enrichment. *Harmful Algae* **4**, 1092-1105 (2005).
147. Ventura, M. & Catalan, J. Reproduction as one of the main causes of temporal variability in the elemental composition of zooplankton. *Limnol. Oceanogr.* **50**, 2043-2056 (2005).
148. Weber, T. S. & Deutsch, C. Ocean nutrient ratios governed by plankton biogeography. *Nature*, **467**, 550-554 (2010).
149. Arnott, D. L. & Vanni, M. J. Nitrogen and phosphorus recycling by the zebra mussel (*Dreissena polymorpha*) in the western basin of Lake Erie. *Can. J. Fish. Aqua. Sci.* **53**, 646-659 (1996).
150. Chrzanowski, T. H., Lukomski, N. C. & Grover, J. P. Elemental stoichiometry of a mixotrophic protist grown under varying resource conditions. *J. Eukaryot. Microbiol.* **57**, 322-327 (2010).
151. Danger, M., Allard, B., Arnous, M. B., Carrias, J. F., Mériquet, J., Ten-Hage, L. & Lacrois, G. Effects of food-web structure on the quantity and the elemental quality of sedimenting material in shallow lakes. *Hydrobiologia* **679**, 251-266 (2012).
152. Elser, J. J. & George, N. B. The stoichiometry of N and P in the pelagic zone of Castle Lake, California. *J. Plankton Res.* **15**, 977-992 (1993).
153. Elser, J. J. & Urabe, J. The stoichiometry of consumer-driven nutrient recycling: theory, observations, and consequences. *Ecology* **80**, 735-751 (1999).
154. Glaholt, Jr. S. P. & Vanni, M. J. Ecological responses to simulated benthic-derived nutrient subsidies mediated by omnivorous fish. *Freshwater Biol.* **50**, 1864-1881 (2005).

155. Higgins, K. A., Vanni, M. J. & González, M. J. Detritivory and the stoichiometry of nutrient cycling by a dominant fish species in lakes of varying productivity. *Oikos* **114**, 419-430 (2006).
156. Hillebrand, H. & Lehmpfulh, V. Resource stoichiometry and consumers control the biodiversity-productivity relationship in pelagic metacommunities. *Am. Nat.* **178**, 171-181 (2011).
157. Hood, J. M., Vanni, M. J. & Flecker, A. S. Nutrient recycling by two phosphorus-rich grazing catfish: the potential for phosphorus-limitation on fish growth. *Oecologia* **146**, 247-257 (2005).
158. Huang, L., Wu, Y., Wan, R. J. & Zhang, J. Carbon, nitrogen and phosphorus stoichiometry in Japanese anchovy (*Engraulis japonicus*) from the Huanghai Sea, China. *Acta Oceanogr. Sinica* **31**, 154-160 (2012).
159. McManamay, R. A., Webster, J. R., Valett, H. M. & Dolloff, C. A. Does diet influence consumer nutrient cycling? Macroinvertebrate and fish excretion in streams. *J. N. Am. Benthol. Soc.* **30**, 84-102 (2011).
160. Pilati, A. & Vanni, M. J. Ontogeny, diet shifts, and nutrient stoichiometry in fish. *Oikos* **116**, 1663-1674 (2007).
161. Torres, L. E. & Vanni, M. J. Stoichiometry of nutrient excretion by fosh: Interspecific variation in a hypereutrophic lake. *Oikos*, **116**, 259-270 (2007).
162. Rothlisberger, J. D., Baker, M. A. & Frost, P. C. Effects of periphyton stoichiometry on mayfly excretion rates and nutrient ratios. *J. N. Am. Benthol. Soc.* **27**, 497-508 (2008).
163. Schindler, D. E. & Eby, L. A. Stoichiometry of fishes and their prey: implications for nutrient recycling. *Ecology* **78**, 1816-1831 (1997).
164. Sterner, R. W., Elser, J. J. & Hessen, D. O. Stoichiometric relationships among producers, consumers and nutrient cycling in pelagic ecosystems. *Biogeochemistry* **17**, 49-67 (1992).
165. Urabe, J. N-cycling and P-cycling coupled by grazers activities – food quality and nutrient release by xooplankton. *Ecology*, **74**, 2337-2350 (1993).
166. Urabe, J., Nakanishi, M. & Kawabata, K. Contribution of metazoan plankton to the cycling of nitrogen and phosphorus in lake Biwa. *Limnol. Oceanogr.* **40**, 232-241 (1995).

167. Vanni, M. J., Flecker, A. S., Hood, J. M. & Headworth, J. L. Stoichiometry of nutrients recycling by vertebrates in a tropical stream: linking species identity and ecosystem processes. *Ecol. Let.* **5**, 285-293 (2002).
168. Arnold, K. H., Shreeve, R. S., Atkinson, A. & Clarke, A. Growth rate of Antarctic krill, *Euphasia superba*: comparison of the instantaneous growth rate method with nitrogen and phosphorus stoichiometry. *Limnol. Oceanogr.* **49**, 2152-2161 (2004).
169. Carrillo, P., Villar-Argaiz, M. & Medina-Sánchez, J. M. Relationship between N:P ratio and growth rate during the life cycle of calanoid copepods: An in situ measurement. *J. Plank. Res.* **23**, 537-547 (2001).
170. Chrzanowski, T. H. & Grover, J. P. Elemental content of *Pseudomonas fluorescens* varies with growth rate and temperature: A replicated chemostat study addressing ecological stoichiometry. *Limnol. Oceanogr.* **53**, 1242-1251 (2008).
171. Bi, R., Arndt C. & Sommer, U. Stoichiometric responses of phytoplankton species to the interactive effect of nutrient supply ratios and growth rates. *J. Phycol.* **48**, 539-549 (2012).
172. Hessen, D. O., Jensen, T. C., Kyle, M. & Elser, J. J. RNA responses to N- and P-limitation: reciprocal regulation of stoichiometry and growth rate in *Brachionus*. *Funct. Ecol.* **21**, 956-962 (2007).
173. Hillebrand, H. & Sommer, U. The nutrient stoichiometry of benthic microbial growth: Redfield proportions are optimal. *Limnol. Oceanogr.* **44**, 440-446 (1999).
174. Karpinets, T. V., Greenwood, D. J., Sams, C. E. & Ammons, J. T. RNA:protein ratio of the unicellular organism as a characteristic of phosphorus and nitrogen stoichiometry and of the cellular requirement of ribosomes for protein synthesis. *BMC Biol.* **4**, 30 (2006).
175. Lagus, A., Suomela, J., Weithoff, G., Heikkilä, K., Helmien, H. & Sipua, J. (2004) Species-specific differences in phytoplankton responses to N and P enrichments and the N:P ratio in the Archipelago Sea, northern Baltic Sea. *J. Plankton Res.* **26**, 779-798 (2004).
176. Main, T. M., Dobberfuhl, D. R. & Elser, J. J. N:P stoichiometry and ontogeny of crustacean zooplankton: A test of the growth rate hypothesis. *Limnol. Oceanogr.* **42**, 1474-1478 (1997).



177. Makino, W. & Cotner, J. B. Elemental stoichiometry of a heterotrophic bacterial community in a freshwater lake: implications for growth- and resource-dependent variations. *Aquat. Microb. Ecol.* **34**, 33-41 (2004).
178. Naddafi, R., Goefkoop, W., Grandin, U. & Eklöv, P. Variation in tissue stoichiometry and condition index of zebra mussels in invaded Swedish lakes. *Biol. Invasions* **14**, 2117-2131 (2012).
179. Stahl-Delbanco, A., Hansson, L. A. & Gyllstrom, M. Recruitment of resting stages may induce blooms of microcystis at low N:P ratios. *J. Plankton Res.* **25**, 1099-1105 (2003).
180. Tanner, D. K., Brazner, J. C. & Brady, V. J. Factors influencing carbon, nitrogen, and phosphorus content of fish from a Lake Superior coastal wetland. *Can. J. Fish. Aqu. Sci.* **57**, 1243-1251 (2000).
181. Villar-Argaiz, M., Medina-Sánchez, J. M. & Carrillo, P. Microbial plankton response to contrasting climatic conditions: insights from community structure, productivity and fraction stoichiometry. *Aquat. Microb. Ecol.* **29**, 253-266 (2002).
182. Vrede, T., Dobberfuhl, D. R., Kooijman, S. A. L. M. & Elser, J. J. Fundamental connections among organism C:N:P stoichiometry, macromolecular composition, and growth. *Ecology* **85**, 1217-1229 (2004).
183. Weider, L. J., Glenn, K. L., Kyle, M. & Elser, J. J. Associations among ribosomal (r)DNA intergenic spacer length, growth rate, and C : N: P stoichiometry in the genus *Daphnia*. *Limnol. Oceanogr.* **49**, 1417-1423 (2004).
184. Elser, J. J. *et al.* Pelagic C:N:P stoichiometry in a eutrophied lake: responses to a whole-lake food-web manipulation. *Ecosystems* **3**, 293-307 (2000).
185. Marino, R., Chan, F., Howarth, R. W., Pace, M. L. & Likens, G. E. Ecological constraints on planktonic nitrogen fixation in saline estuaries. I. Nutrient and trophic controls. *Mar. Ecol. Prog. Ser.* **309**, 25-39 (2006).
186. Shurin, J. B., Gruner, D. S. & Hillebrand, H. All wet or dried up? Real differences between aquatic and terrestrial food webs. *Proc. R. Soc. B* **273**, 1-9 (2006).
187. Hardtle, W., Niemeyer, M., Niemeyer, T., Assmann, T. & Fottner, S. Can management compensate for atmospheric nutrient deposition in heathland ecosystems? *J. Appl. Ecol.* **43**, 759-769 (2006).

188. Limpens, J., Berendse, F. & Klees, H. How phosphorus impacts availability affects the impact of nitrogen deposition on Sphagnum and vascular plants in bogs. *Ecosystems* **7**, 793-804 (2004).
189. Pilkington, M. G. *et al.* Effects of increased deposition of atmospheric nitrogen on upland moor: Nitrogen budgets and nutrient accumulation. *Environ. Pollut.* **138**, 473-484 (2005).
190. Stevens, C. J., Dise, N. B., Gowing, D. J. G. & Mountford, J. O. Loss of forb biodiversity in relation to nitrogen deposition in the UK: regional trends and potential controls. *Global Change Biol.* **12**, 1823-1833 (2006).
191. Ballantyne, IV, F., Menge, D. N. L., Ostling, A. & Hosseini, P. Nutrient recycling affects autotroph and ecosystem stoichiometry. *Am. Nat.* **171**, 511-523 (2008).
192. Breeuwer, A. *et al.* Response of Sphagnum species mixtures to increased temperature and nitrogen availability. *Plant Ecol.* **204**, 97-111 (2009).
193. Elser, J. J., Fagan, W. F., Kerkhoff, A. J., Swenson, N. G. & Enquist, B. J. Biological stoichiometry of plant production: metabolism, scaling and ecological response to global change. *New Phytol.* **186**, 593-608 (2010).
194. Garrish, V., Cernusak, L. A., Winter, K. & Turner, B. L. Nitrogen to phosphorus ratio of plant biomass versus soil solution in a tropical pioneer tree, *Ficus insipida*. *J. Exp. Bot.* **61**, 3735-3748 (2010).
195. Richardson, S. J., Allen, R. B. & Doherty, J. E. Shifts in leaf N:P ratio during resorption reflect soil P in temperate rainforest. *Funct. Ecol.* **22**, 738-745 (2008).
196. Olde Venterink, H. Does phosphorus limitation promote species-rich plant communities? *Plant Soil* **345**, 1-9 (2011).
197. Wanek, W & Zotz, G. Are vascular epiphytes nitrogen or phosphorus limited? A study of plant <sup>15</sup>N fractionation and foliar N:P stoichiometry with the tank bromeliad *Vriesea sanguinolenta*. *New Phytol.* **192**, 462-470 (2011).
198. Zotz, G. & Asshoff, R. Growth in epiphytic bromeliads: response to the relative supply of phosphorus and nitrogen. *Plant Biol.* **12**, 108-112 (2010).

199. Fujita, Y., de Ruiter, P. C., Wassen, M. J. & Heil, G. W. Time-dependent, species-specific effects of N:P stoichiometry on grassland plant growth. *Plant Soil* **334**, 99-112 (2010).
200. Apple, J. L., Wink, M., Wills, S. E. & Bishop, J. G. Successional change in phosphorus stoichiometry explains the diverse relationships between herbivory and lupin density on Mount St. Helens. *Plos One* **4**, e7807 (2009).
201. Bishop, J. G., O'Hara, N. B., Titus, J. H., Apple, J. L., Gill, R. A. & Wynn, L. N-P co-limitation of primary production and response of arthropods to N and P in early primary succession on Mount St-Helens volcano. *Plos One* **5**, e13598 (2010).
202. Hofmeister, J., Hosek, J., Modrý, M. & Rolecek, J. The influence of light and nutrient availability on herb layer species richness in oak-dominated forest in central Bohemia. *Plant Ecol.* **205**, 57-75 (2009).
203. Mulder, C. & Elser, J. J. Soil acidity, ecological stoichiometry and allometric scaling in grassland food webs. *Global Change Biol.* **15**, 2730-2738 (2009).
204. Roem, W. J. & Berendse, F. Soil acidity and nutrient supply ratio as possible factors determining changes in plant species diversity in grassland and heathland communities. *Biol. Conserv.* **92**, 151-161 (2000).
205. Schindler, D. W. *et al.* The cultural eutrophication of Lac la Biche, Alberta, Canada: a paleoecological study. *Can. J. Fish. Aqu. Sci.* **65**, 2211-2223 (2008).
206. Wardle, D. A. *et al.* Aboveground and belowground effects of single-tree removals in New Zealand rain forest. *Ecology* **89**, 1232-1245 (2008).
207. Blanes, M. C., Emmett, B. A., Viñegla, B. & Carreira, J. A. Alleviation of P limitation makes tree roots competitive for N against microbes in a N-saturated conifer forest: A test through P fertilization and <sup>15</sup>N labeling. *Soil Biol. Biochem.* **48**, 51-59 (2012).
208. Güsewell, S. & Gessner, M. O. N : P ratios influence litter decomposition and colonization by fungi and bacteria in microcosms. *Funct. Ecol.* **23**, 211-219 (2009).
209. Güsewell, S. & Verhoeven, J. T. A. Litter N:P ratios indicate whether N or P limits the decomposability of graminoid leaf litter. *Plant Soil* **287**, 131-143 (2006).

210. Hättenschwiler, S. & Jergensent, H. B. Carbon quality rather than stoichiometry controls litter decomposition in a tropical rain forest. *J. Ecol.* **98**, 754-763 (2010).
211. Schneider, T. *et al.* Who is who in litter decomposition? Metaproteomics reveals major microbial players and their biogeochemical functions. *Isme J.* **6**, 1749-1762 (2012).
212. Zhang, L. X., Bai, Y. F. & Han, X. G. Differential responses of N:P stoichiometry of *Leymus chinensis* and *Carex korshinskyi* to N additions in a steppe ecosystem in Nei Mongol. *Acta Bot. Sinica* **46**, 259-270 (2004).
213. Agren, G. I. The C : N : P stoichiometry of autotrophs – theory and observations. *Ecol. Let.* **7**, 185-191 (2004).
214. Cernusak, L. A., Winter, K. & Turner, B. L. Leaf nitrogen to phosphorus ratios of tropical trees: experimental assessment of physiological and environmental controls. *New Phytol.* **185**, 770-779 (2010).
215. Chen, M. M., Yin, H. B., O'Connor, P., Wang, Y. S. & Zhu, Y. G. C: N: P stoichiometry and specific growth rate of clover colonized by arbuscular mycorrhizal fungi. *Plant Soil* **326**, 21-29 (2010).
216. Elser, J. J. *et al.* Growth rate-stoichiometry couplings in diverse biota. *Ecol. Let.* **6**, 936-943 (2003).
217. Gotelli, N. J. & Ellison, A. M. Nitrogen deposition and extinction risk in the northern pitcher plant, *Sarracenia purpurea*. *Ecology* **83**, 2758-2765 (2002).
218. Güsewell S. & Bollens, U. Compositions of plant species mixtures grown at various N:P ratios and levels of nutrient supply. *Basic Appl. Ecol.* **4**, 453-466 (2003).
219. Matzek, V. & Vitousek, P. M. N : P stoichiometry and protein : RNA ratios in vascular plants: an evaluation of the growth rate hypothesis. *Ecol. Let.* **12**, 765-771 (2009).
220. Niklas, K. L., Owens, T., Reich, P. B. & Cobb, E. D. Nitrogen/phosphorus leaf stoichiometry and the scaling of plant growth. *Ecol. Let.* **8**, 636-642 (2005).

221. Peng, Y., Niklas, K. J. & Sun, S. The relationship between relative growth rate and whole-plant C : N : P stoichiometry in plant seedlings grown under nutrient-enriched conditions. *J. Plant Ecol.* **4**, 147-156 (2011).
222. Reich, P. B., Oleksyn, J., Wright, I. J., Niklas, K. J., Hedin, L. & Elser, J. J. Evidence of a general 2/3-power law of scaling leaf nitrogen to phosphorus among major plant groups and biomes. *Proc. R. Soc. B* **277**, 877-883 (2010).
223. Watts, T., Woods, H.A., Hargand, S., Elser, J.J. & Markov, T.A. Biological stoichiometry of growth in *Drosophila melanogaster*. *J. Insect Physiol.* **52**, 187-193 (2006).
224. Willby, N. J., Pulford, I. D. & Flowers, T. H. Tissue nutrient signatures predict herbaceous-wetland community responses to nutrient availability. *New Phytol.* **152**, 463-481 (2001).
225. Yu, Q., Wu, H., He, N., Lü, X., Wang, Z., Elser, J.J., Wu, J. & Han X. Testing the growth rate hypothesis in vascular plants with above- and below-ground biomass. *Plos One* **7**, 332162 (2012).
226. Amazonas, N. T., Martinelli, L. A., Piccolo, M. C. & Rodrigues, R. R. Nitrogen dynamics during ecosystem development in tropical forest restoration. *For. Ecol. Manag.* **262**, 1551-1557 (2011).
227. An, H & Shangguan, Z. Leaf stoichiometric trait and specific leaf area of dominant species in the secondary succession of the loess plateau. *Pol. J. Ecol.* **58**, 103-113 (2010).
228. Bedford, B.L., Walbridge, M.R. & Aldous, A. Patterns in nutrient availability and plant diversity of temperate North American wetlands. *Ecology*, **80**, 2151-2169 (1999).
229. Blanck, Y. L., Gowda, J., Martensson, L. M., Sandberg, J. & Fransson, A. M. Plant species richness in a natural Argentinian matorral shrub-land correlates negatively with levels of plant phosphorus. *Plant Soil* **345**, 11-21 (2011).
230. Güsewell, S., Bailey, K. M., Roem, W. J. & Bedford, B. L. Nutrient limitation and botanical diversity in wetlands: can fertilization raise species richness? *Oikos* **109**, 71-80 (2005).
231. Lambers, H., Brundrett, M. C., Raven, J. A. & Hopper, S. D. Plant mineral nutrition in ancient landscapes: high plant species diversity on infertile soils is linked to functional diversity for nutritional strategies. *Plant Soil* **348**, 7-27 (2011).

232. Lilleskov, E. A., Fahey, T. J., Horton, T. R. & Lovett, G. M. Belowground ectomycorrhizal fungal community change over a nitrogen deposition gradient in Alaska. *Ecology* **83**, 104-115 (2002).
233. Pekin, B.K., Boer, M.M., Wittkuhn, R.S., Macfarlane, C. & Grieeson, P.F., Plant diversity is linked to nutrient limitation of dominant species in a world biodiversity hotspot. *J. Veg Sci.* **23**, 745-754 (2012).
234. Powers, J. S. & Tiffin, P. Plant functional type classifications in tropical dry forest in Costa Rica: leaf habit versus taxonomic approaches. *Funct. Ecol.* **24**, 927-936 (2010).
235. Tao, L. & Hunter, M. D. Does anthropogenic nitrogen deposition induce phosphorus limitation in herbivorous insects? *Global Change Biol.* **18**, 1843-1853 (2012).
236. Townsend A. R., Cleveland, C. C., Cory, C., Asner, G. P. & Bustamante, M. M. C. Controls over foliar N:P ratios in tropical rain forest. *Ecology* **88**, 107-118 (2007).
237. Van der Heijden, M. G. A., Verkade, S. & de Bruin, S. J. Mycorrhizal fungi reduce the negative effects of nitrogen enrichment on plant community structure in dune grassland. *Global Change Biol.* **14**, 2626-2635 (2008).
238. Waite, M. & Sack, L. Does global stoichiometric theory apply to bryophytes? Tests across an elevation x soil age ecosystem matrix on Mauna Loa, Hawaii. *J. Ecol.* **99**, 122-134 (2011).
239. Wakefield, A. E., Gotelli, N. J., Wittman, S. E. & Ellison, A. M. Prey addition alters nutrient stoichiometry of the carnivorous plant *Sarracenia purpurea*. *Ecology* **86**, 1737-1743 (2005).
240. Baron, J. S. *et al.* Ecosystem responses to nitrogen deposition in the Colorado front range. *Ecosystems* **3**, 352-368 (2000).
241. Bragazza, L. *et al.* Nutritional constraints in ombrotrophic *Sphagnum* plants under increasing atmospheric nitrogen deposition in Europe. *New Phytol.* **163**, 609-616 (2004).
242. Granath, G., Strengbom, J. & Rydin, H. Direct physiological effects of nitrogen on Sphagnum: a greenhouse experiment. *Funct. Ecol.* **26**, 353-364 (2012).

243. Sorrell, B. K., Chague-Golf, C., Basher, L. M. & Partridge, T. R. N:P ratios, delta N-15 fractionation and nutrient resorption along a nitrogen to phosphorus limitation gradient in an oligotrophic wetland complex. *Aquat. Bot.* **94**, 93-101 (2011).
244. Lal, R. Promise and limitations of soils to minimize climate change. *J Soil Water Conserv* **63**, 113A-118A (2008).
245. Cleveland, C. C. & Liptzin, D. C:N:P stoichiometry in soil: is there a "Redfield ratio"? for the microbial biomass? *Biogeochemistry* **85**, 235-252 (2007).
246. Wang, Y. P., Law, R. M. & Pak, B. 2010. A global model of carbon, nitrogen and phosphorus cycles for the terrestrial biosphere. *Biogeosciences* **7**, 2261-2282 (2010).
247. Filippelli, G. M. The global phosphorus cycle: Past, Present, and Future. *Elements* **4**, 89–95 (2008).
248. Smil, V. Phosphorus in the environment: natural flows and human interferences. *An Rev Energy Environ.* **25**, 53-58 (2000).
249. Schröeder, J. J., Cordell, D., Smit A. L. & Rosemarin, A. Sustainable use of phosphorus. Plant Research International, part of Wageningen UR. Report **357** pp. 12-39 (2010).
250. Cisse, L. & Mrabet, T. World phosphate production: overview and prospects. *Phosphorus Res. Butl.* **15**, 21-25 (2004).
251. Föllmi, K. B. The phosphorus cycle, phosphogenesis and marine phosphate-rich deposits. *Earth-Sci. Rev.* **40**, 55-124 (1996).
252. Lavelle, P. *et al.* Nutrient Cycling, In Etchevers, J., & Tiessen H. (eds). *Ecosystems and Humans Well-being: Current Status and Trends*. IV Millenium Ecosystem Assessment (program). Condition and Trends Working Group. pp 331-353 (2008).
253. Dieter, D., Elsenbeer, H. & Turner, B. L. Phosphorus fractionation in lowland tropical rainforest soils in central Panama. *Catena* **82**, 118-125 (2010).
254. Talibudeen, O. Isotopical exchangeable phosphorus in soils. *J. Soil Sci.* **9**, 120-129 (1958).

255. Lerman A., Mackenzie F. T. & Ver M. Coupling of the perturbed C, N, P Cycles in Industrial time. *Aquatic Geochem.* **10**, 3-32 (2004).
256. Pan, Y. *et al.* A Large and Persistent Carbon Sink in the World's Forests. *Science* **33**, 988-993. (2011).
257. Alcamo, J., van Vuuren, D. P. & Cramer, W. Changes in Ecosystem Services and Their Drivers across the Scenarios. (Washington DC, 2005).
258. Vergutz, L., Manzoni, S., Porporato, A., Ferreira Novais, R. & Jackson, R.B. Global resorption efficiencies and concentrations of carbon and nutrients in leaves of terrestrial plants. *Ecol. Monogr.* **82**, 205-220 (2012).
259. Gifford, R. M., Barrett, D. J. & Lutze, J. L. 2000. The effects of elevated [CO<sub>2</sub>] on the C:N and C:P mass ratios of plant tissues. *Plant Soil* **224**, 1-14 (2000).
260. Houlton, B. Z., Wang, Y. P., Vitousek, P. M. & Field, C. B. A unifying framework for dinitrogen fixation in the terrestrial biosphere. *Nature* **454**, 237-334 (2008).
261. Achat, D. L. *et al.* Phosphorus status of soils from contrasting forested ecosystems in Southwestern Siberia: combined effects of plant species and climate. *Biogeosciences Discussions* **9** (2012).
262. Zhao, M. & Running, S. W. Drought-Induced Reduction in Global Terrestrial Net Primary Production from 2000 Through 2009. *Science* **329**, 940-943 (2010).
263. Liu, J., You, L., Amini, M., Obersteiner, M., Herrero, M., Zehnder, A. J. B. & Yang, H.. A high-resolution assessment on global nitrogen flows in cropland. *Proc. Natl. Acad. Sci. USA* **107**, 8035-8040 (2010).
264. Cleveland, C. C. *et al.* 1999. Global patterns of terrestrial biological nitrogen (N<sub>2</sub>) fixation in natural ecosystems. *Global Biogeochem Cy* **13**, 623-645 (1999).
265. Elser, J. J. *et al.* Global analysis of nitrogen and phosphorus limitation of primary producers in freshwater, marine and terrestrial ecosystems. *Ecol Lett* **10**, 1135-1142 (2007).
266. Johnson, A. H., Frizano, J. & Vann. D. R. Biogeochemical implications of labile phosphorus in forest soils determined by the Hedley fractionation procedure. *Oecologia* **135**, 487-499 (2003).



267. Wardle, D. A., Walker, L. R. & Bardgett, R. D. 2004. Ecosystem Properties and Forest Decline in Contrasting Long-Term Chronosequences. *Science* **305**, 509-513 (2004).
268. Walker, T. W. & Syers, J. K. The fate of phosphorus during pedogenesis. *Geoderma* **15**, 1-19 (1976).
269. Cordell, D., Drangert, J. O. & White, S. The story of phosphorus: Global food security and food for thought. *Global Environ Change* **19**, 292-305 (2009).
270. Childers, D. L., Corman, J., Edwards, M. & Elser, J. J. Sustainability Challenges of Phosphorus and Food: Solutions from Closing the Human Phosphorus Cycle. *Bioscience* **61**, 117-124 (2011).
271. Potter, P., Ramankutty, N., Bennett, E. M. & Donner, S. D. Characterizing the spatial patterns of global fertilizer application and manure production. *Earth Interact.* **14**, 1–22 (2010).
